# Supplementary material
Source: PubMed Central journal article supplement (PMC3653631)
Supplement: NIHMS465836-supplement-1.pdf [file NIHMS465836-supplement-1.pdf]

# **Null alleles of *ABCG2* encoding the breast cancer resistance protein define the new blood group system Junior**

Carole Saison, Virginie Helias, Bryan A. Ballif, Thierry Peyrard, Hervé Puy, Toru Miyazaki, Sébastien Perrot, Muriel Vayssier-Taussat, Mauro Waldner, Pierre-Yves Le Pennec, Jean-Pierre Cartron & Lionel Arnaud

**- Supplementary Figures 1-5**

**- Supplementary Tables 1-2**

# Saison *et al.*, Supplementary Information

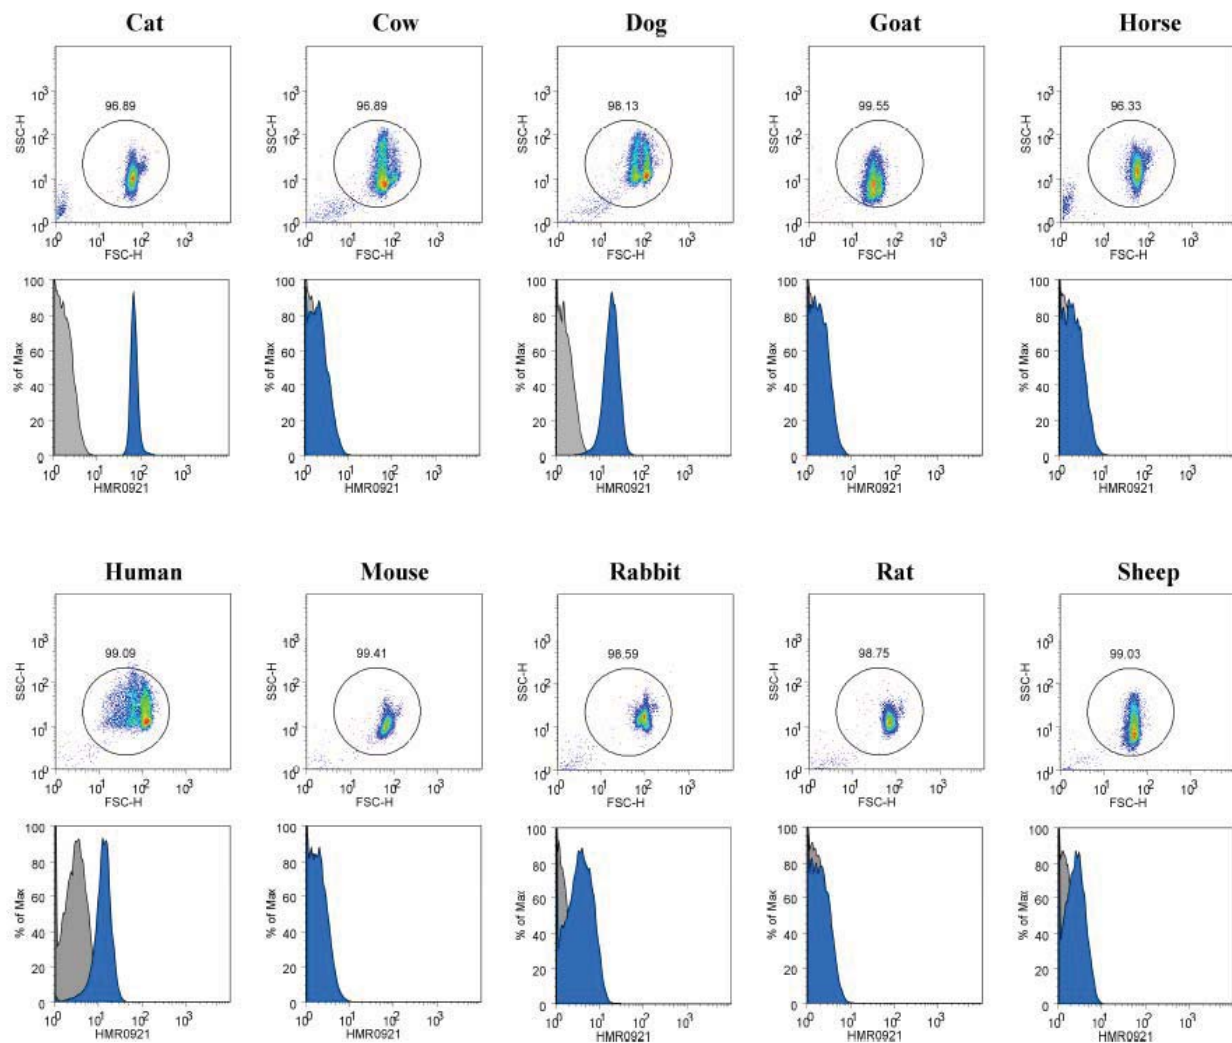

**Supplementary Figure 1: Flow cytometry analysis of RBCs from 10 mammalian species with anti-Jr<sup>a</sup> HMR0921.** Blood samples were taken on EDTA and extensively washed to deplete leukocytes. RBCs were incubated with the human monoclonal HMR0921 (blue profiles) or without (grey profiles) in low-ionic strength solution supplemented with bovine serum albumin. Binding of HMR0921 to RBCs was revealed with a goat F(ab')<sub>2</sub> anti-human IgG(H+L)-PE and immediately analyzed with a FACSCalibur flow cytometer, with the same voltage settings as human RBCs on 05/15/2008. Data were analyzed with FlowJo software; the density dot plots show the FSC/SSC gating of RBCs while the overlays show their HMR0921 staining.



# Saison *et al.*, Supplementary Information

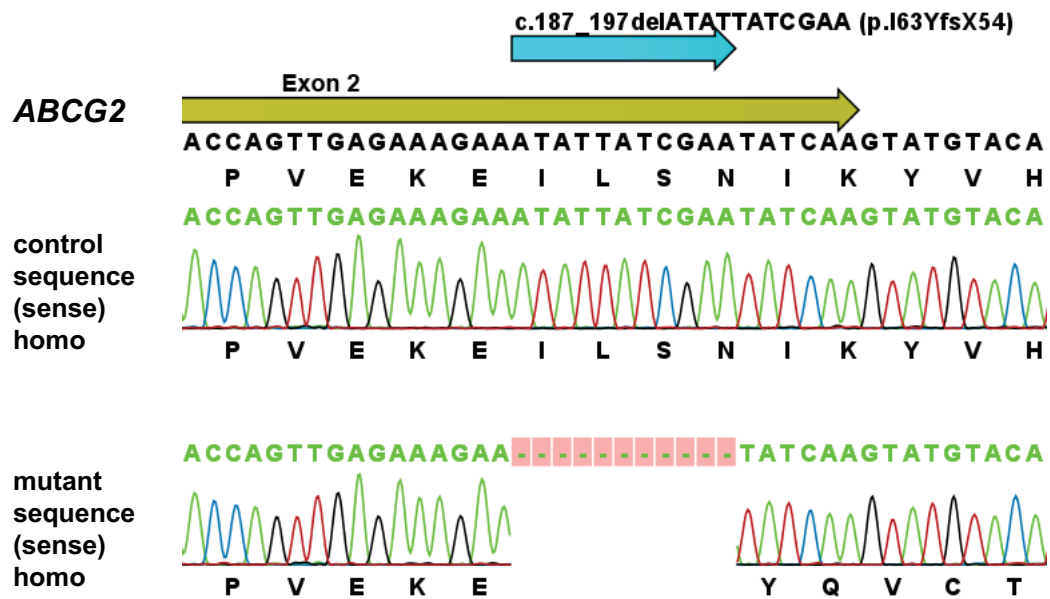

Supplementary Figure 3a: Representative sequencing traces of *ABCG2* null mutation c.187\_197del11 (p.I63YfsX54)

# Saison *et al.*, Supplementary Information

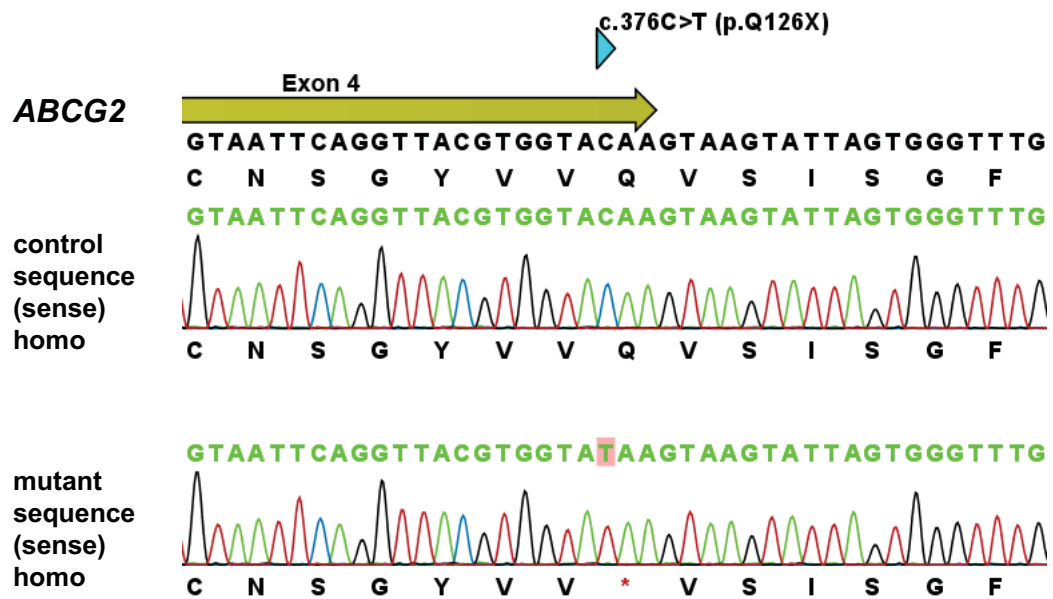

Supplementary Figure 3b: Representative sequencing traces of *ABCG2* null mutation c.376C>T (p.Q126X)

# Saison *et al.*, Supplementary Information

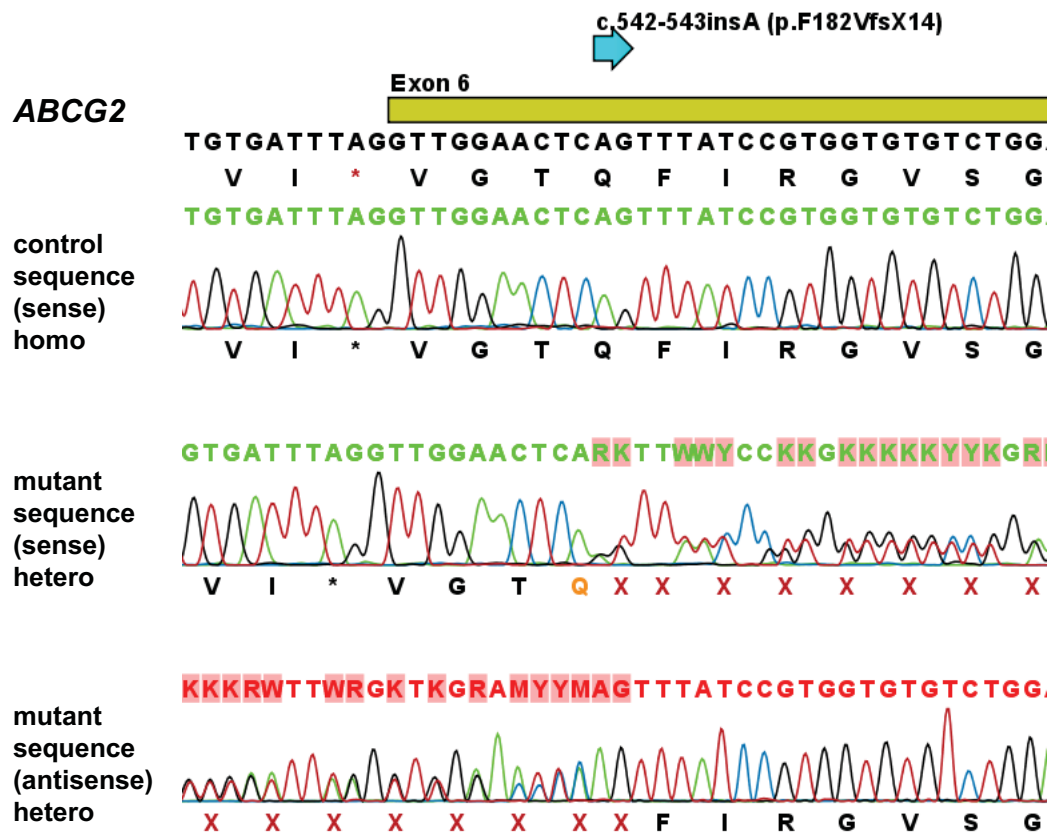

Supplementary Figure 3c: Representative sequencing traces of *ABCG2* null mutation c.542\_543insA (p.F182VfsX14)

# Saison *et al.*, Supplementary Information

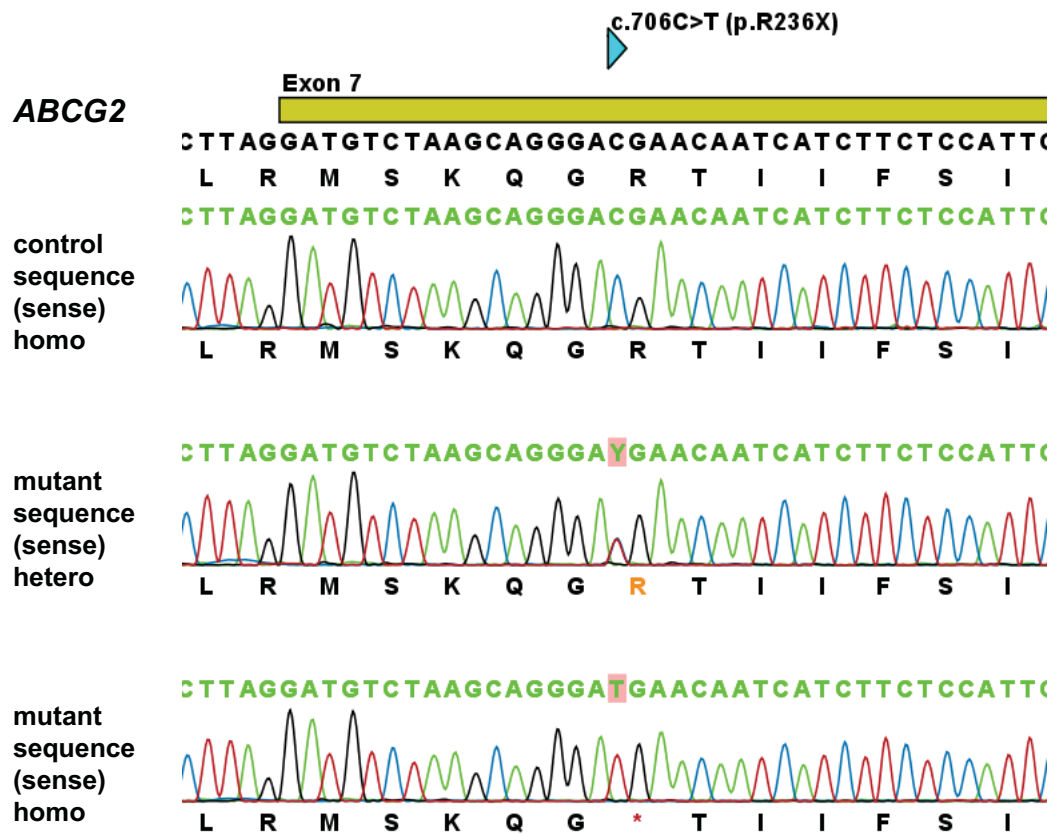

Supplementary Figure 3d: Representative sequencing traces of *ABCG2* null mutation c.706C>T (p.R236X)

# Saison *et al.*, Supplementary Information

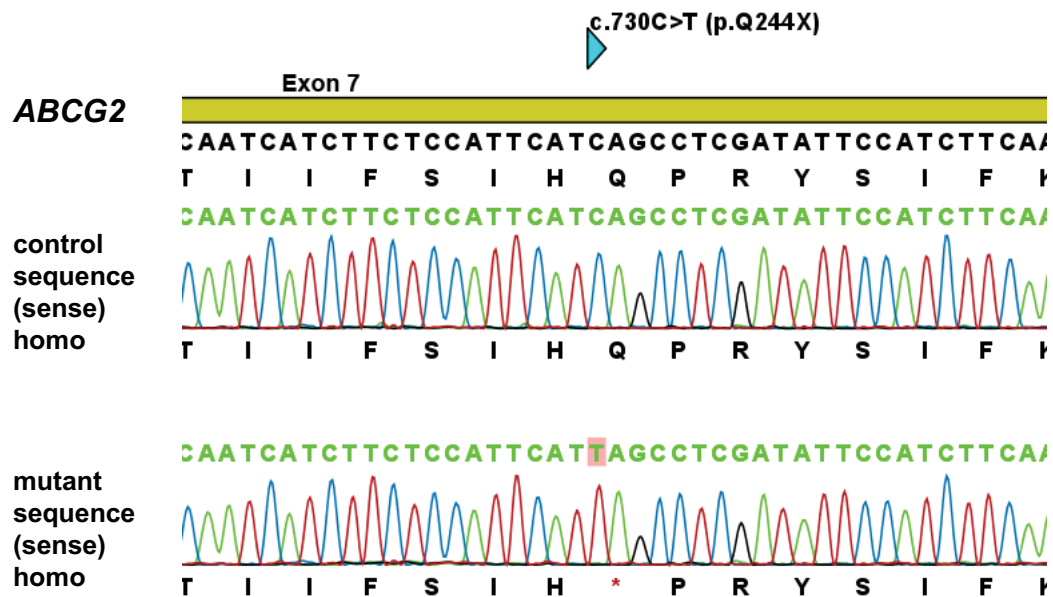

Supplementary Figure 3e: Representative sequencing traces of *ABCG2* null mutation c.730C>T (p.Q244X)



# Saison *et al.*, Supplementary Information

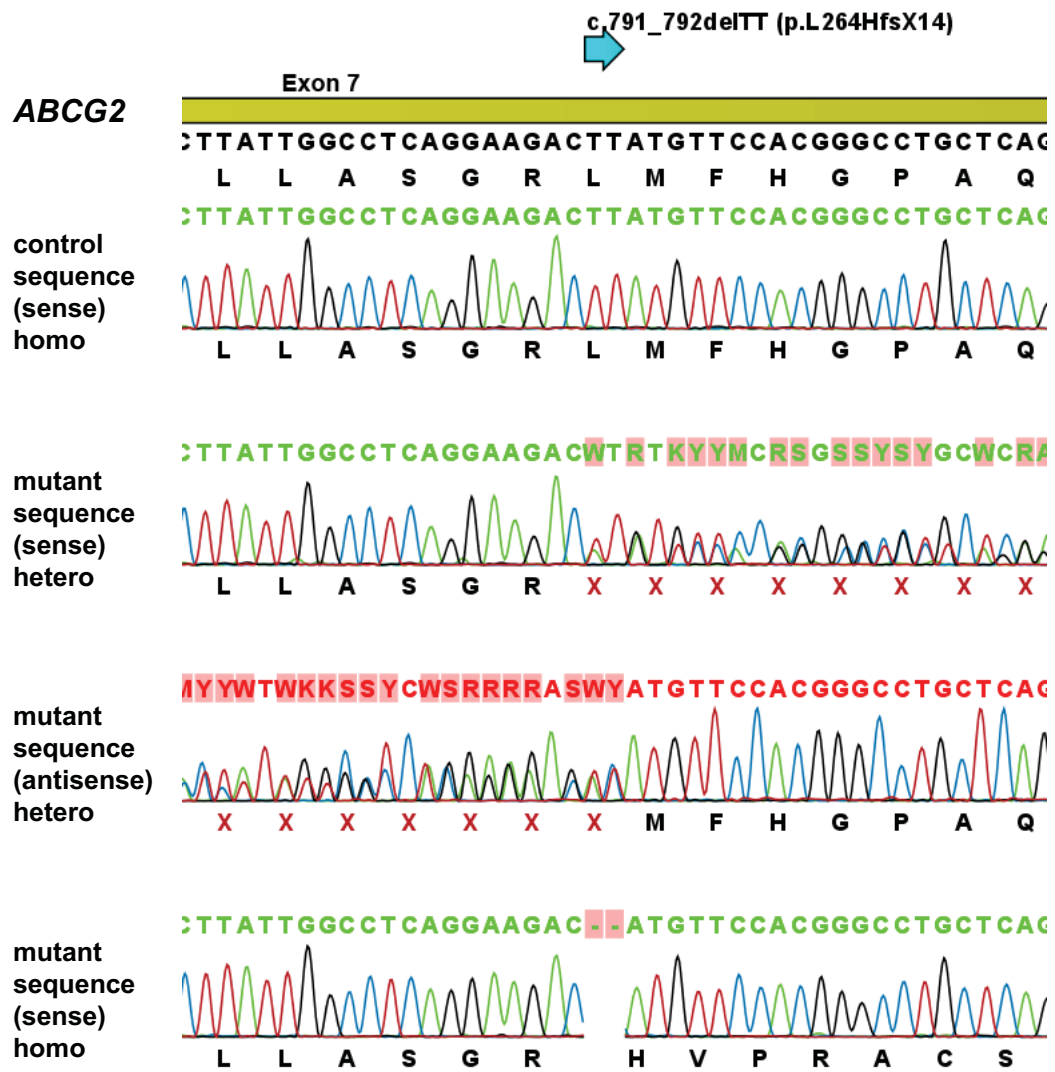

Supplementary Figure 3f: Representative sequencing traces of *ABCG2* null mutation c.791\_792delTT (p.L264HfsX14)

# Saison *et al.*, Supplementary Information

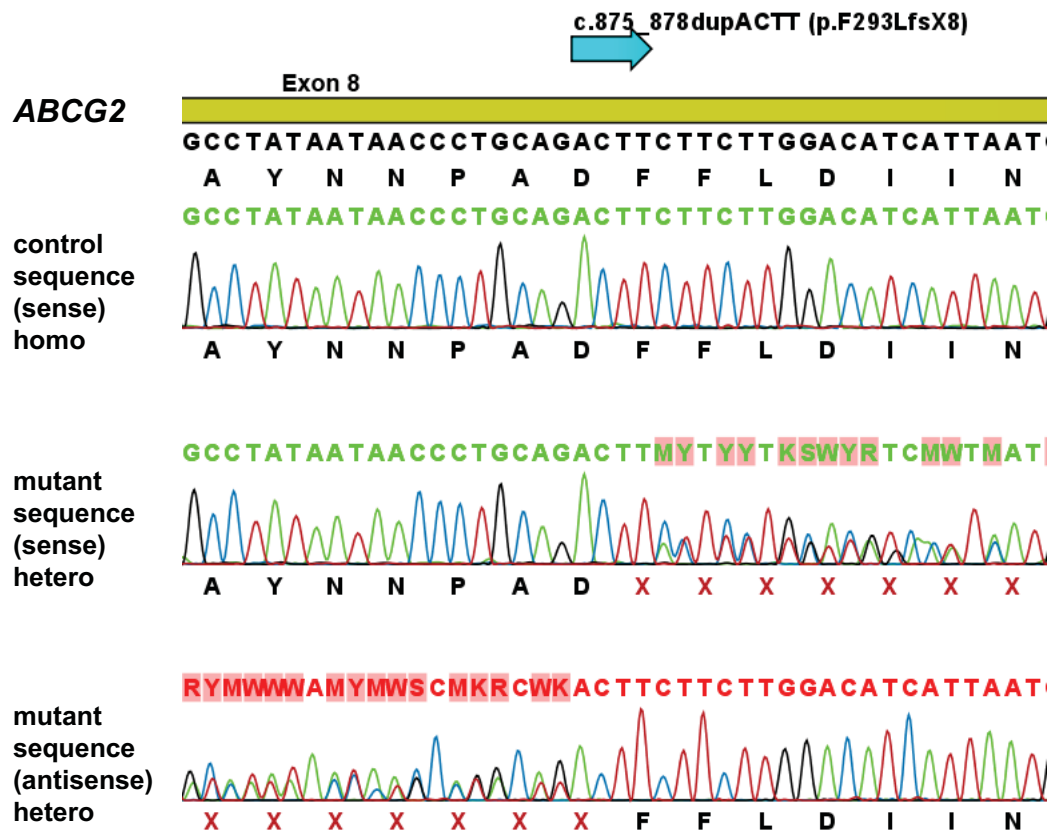

Supplementary Figure 3g: Representative sequencing traces of *ABCG2* null mutation c.875\_878dupACTT (p.F293LfsX8)

# Saison *et al.*, Supplementary Information

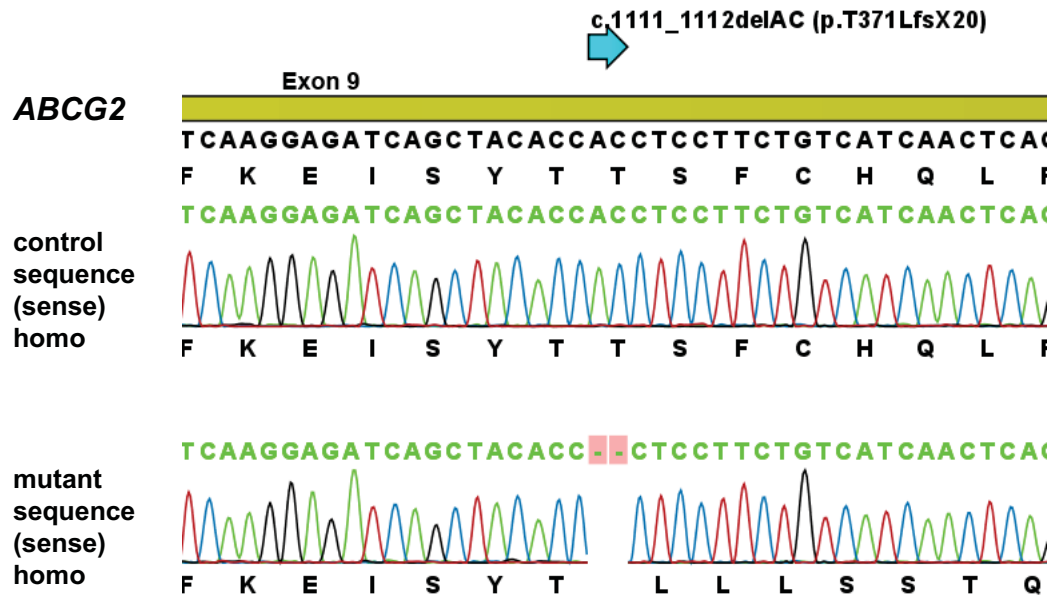

Supplementary Figure 3h: Representative sequencing traces of *ABCG2* null mutation c.1111\_1112delAC (p.T371LfsX20)

# Saison *et al.*, Supplementary Information

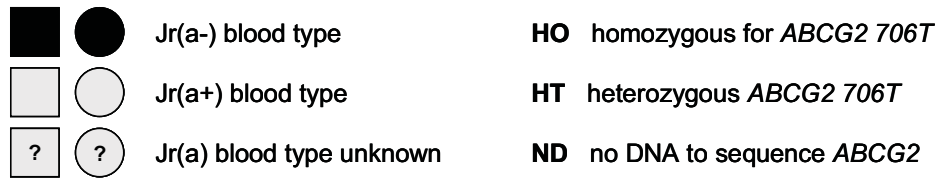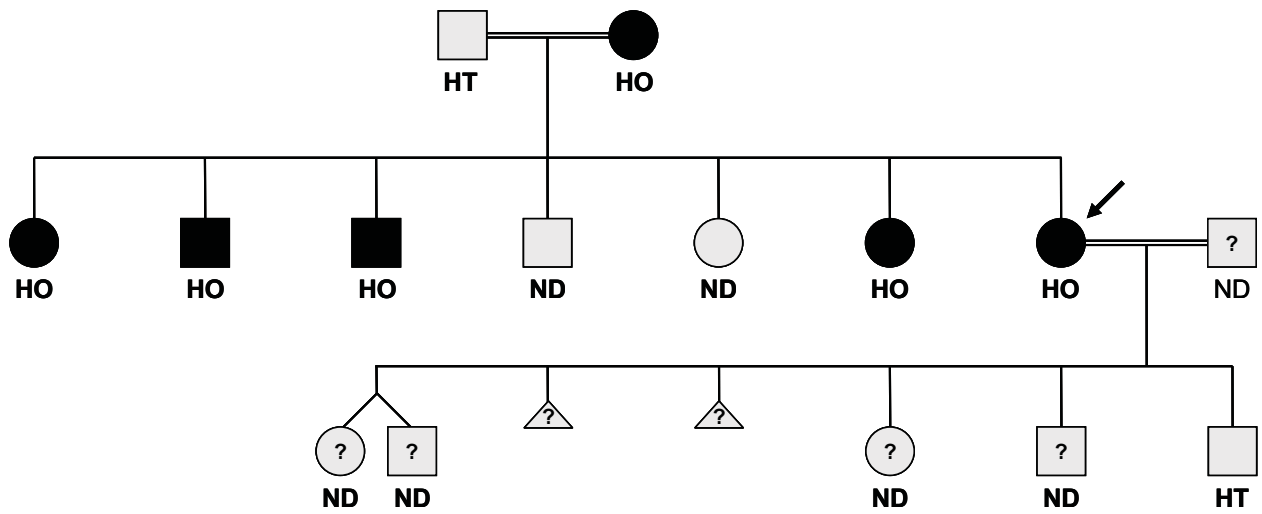

**Supplementary Figure 4: Example of a pedigree of a Jr(a-) subject analyzed in this study.**  
 The Jr(a-) proband (indicated by an arrow) was identified after developing an anti-Jr<sup>a</sup> induced by pregnancy.

# Saison *et al.*, Supplementary Information

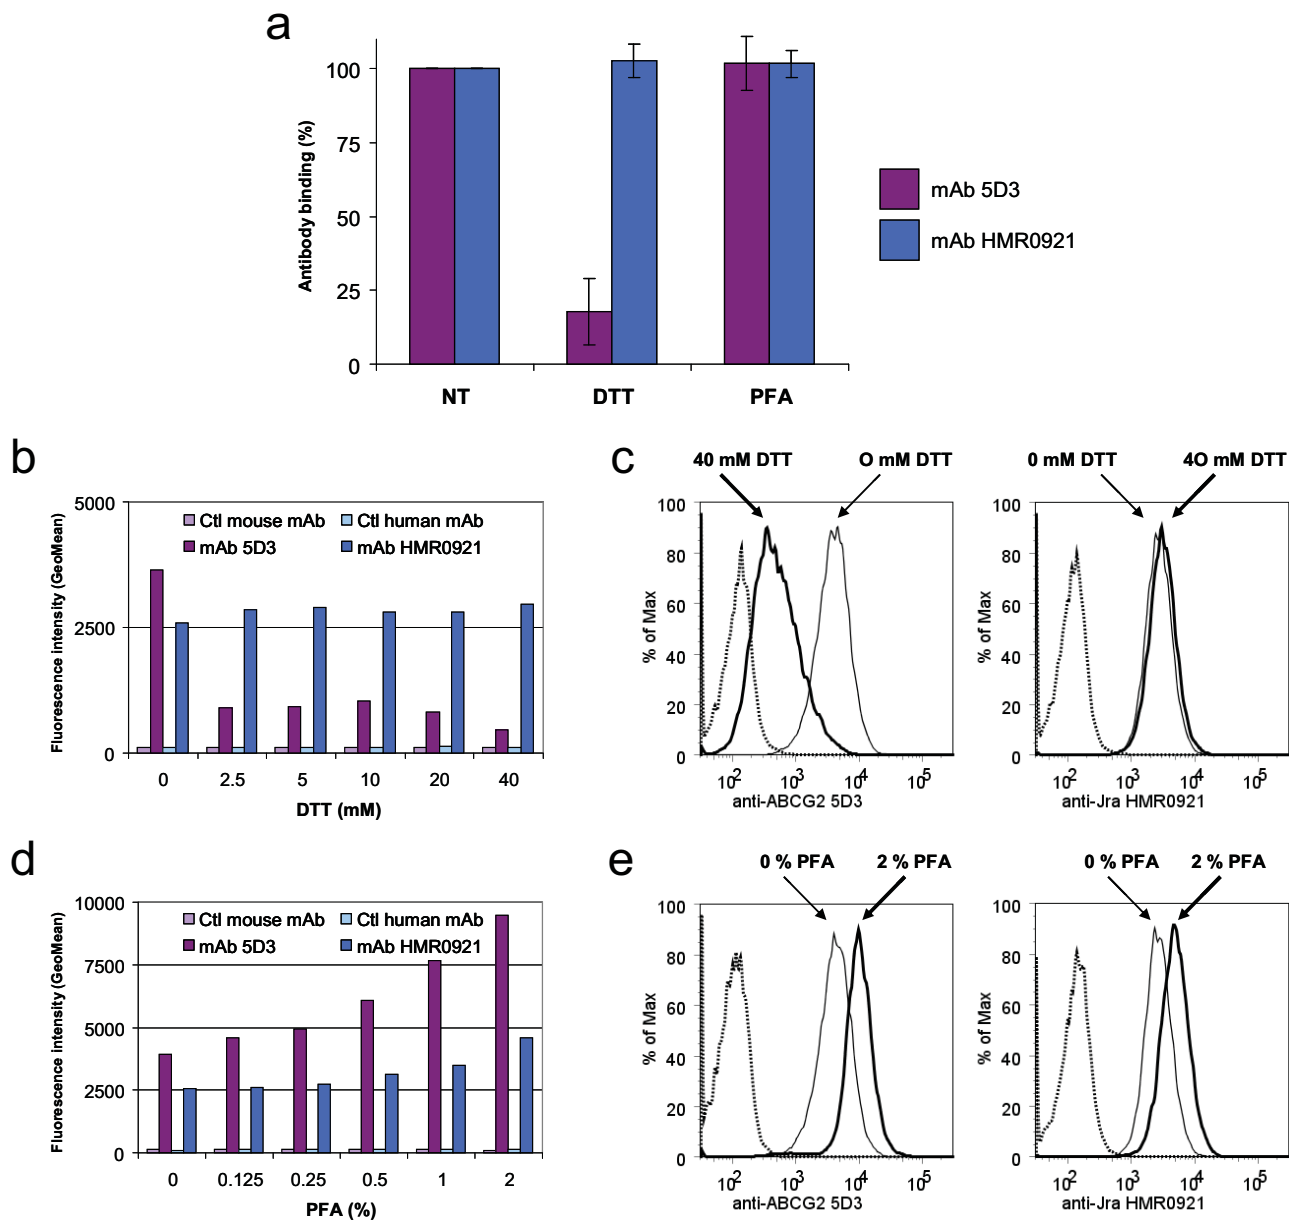

## Supplementary Figure 5: Comparison of the reactivity of monoclonal antibody 5D3 and HMR0921.

(a) Reactivity of 5D3 (purple) or HMR0921 (blue) with human RBCs non-treated (NT), treated with 200 mM dithiothreitol (DTT) or treated with 1 % paraformaldehyde (PFA), as analyzed by flow cytometry (bars represent the means of binding, and error bars the s.d. (n=3)); notably, the epitope recognized by HMR0921 is different from the epitope recognized by 5D3 since only the latter is sensitive to the reducing agent DTT. (b) Reactivity of 5D3 (purple) or HMR0921 (blue), as well as control mouse mAb (clone MCP11; light purple) or control human mAb (clone T27S; light blue) with HeLa cells treated with different concentrations of DTT for 10 min at 21 °C, as analyzed by flow cytometry (bars represents the geometric mean of fluorescence intensity); DTT treatment of HeLa cells reduces the binding of 5D3, but not of HMR0921. (c) Flow cytometry profile of HeLa cells treated with 40 mM DTT (heavy line) or 0 mM DTT (light line), and labeled with 5D3 (left overlay) or HMR0921 (right overlay) as in (b). (d) Same as (b) but with HeLa cells treated with different concentrations of PFA; PFA treatment of HeLa cells increases the binding of both 5D3 and HMR0921. (e) Flow cytometry profile of HeLa cells treated with 2 % PFA (heavy line) or 0% PFA (light line), and labeled with 5D3 (left overlay) or HMR0921 (right overlay) as in (d). Flow cytometry data were acquired with a FACSCanto II flow cytometer and analyzed with FlowJo software.

# Saison *et al.*, Supplementary Information

| Subjects | ABCg2 exon / intron                                      |                                              | Exon 2                             |                                  |                                   |                                                                           | Exon 4                             | Exon 5                             | Exon 6                                      |
|----------|----------------------------------------------------------|----------------------------------------------|------------------------------------|----------------------------------|-----------------------------------|---------------------------------------------------------------------------|------------------------------------|------------------------------------|---------------------------------------------|
|          | Mutation (in NM_004827.1)<br>Reported in dbSNP build 132 | Type of mutation<br>Position on NT_016354.19 | c.19G>A<br>missense<br>13608850C>T | c.34G>A<br>missense<br>rs2231137 | c.166C>A<br>silent<br>13608703C>A | c.187_197delIATATTATCGAA<br>frameshift<br>13608682_13608672delTATAATAGCTT | c.376C>T<br>rs72552713<br>nonsense | c.393G>T<br>missense<br>1360072C>A | c.542_543insA<br>frameshift<br>13590653insA |
|          | Phenotype                                                | Sex                                          | Origine                            |                                  |                                   |                                                                           |                                    |                                    |                                             |
| BENA     | Jr(a-)                                                   | F                                            | Northwestern France                | G/G                              | G/G                               | C/C                                                                       | HO                                 | G/G                                | -                                           |
| YAN      | Jr(a-)                                                   | F                                            | Korea                              | G/G                              | G/G                               | C/A                                                                       | -                                  | G/G                                | -                                           |
| KAN      | Jr(a-)                                                   | F                                            | Korea                              | G/G                              | G/G                               | C/C                                                                       | HO                                 | G/G                                | -                                           |
| LEV      | Jr(a-)                                                   | F                                            | Korea                              | G/G                              | G/G                               | C/C                                                                       | HO                                 | G/G                                | -                                           |
| BER      | Jr(a-)                                                   | F                                            | Central France                     | G/G                              | G/G                               | C/C                                                                       | -                                  | G/G                                | HT                                          |
| BOU      | Jr(a-)                                                   | F                                            | Maghreb                            | G/G                              | G/G                               | C/C                                                                       | -                                  | G/G                                | -                                           |
| GIM      | Jr(a-)                                                   | F                                            | SW France gypsy                    | G/G                              | G/G                               | C/C                                                                       | -                                  | T/T                                | -                                           |
| PAT      | Jr(a-)                                                   | F                                            | SW France gypsy                    | G/G                              | G/G                               | C/C                                                                       | -                                  | T/T                                | -                                           |
| BENO     | Jr(a-)                                                   | F                                            | SW France gypsy                    | G/G                              | G/G                               | C/C                                                                       | -                                  | T/T                                | -                                           |
| REI      | Jr(a-)                                                   | F                                            | SW France gypsy                    | G/G                              | G/G                               | C/C                                                                       | -                                  | T/T                                | -                                           |
| REN      | Jr(a-)                                                   | F                                            | SW France gypsy                    | G/G                              | G/G                               | C/C                                                                       | -                                  | T/T                                | -                                           |
| KAR      | Jr(a-)                                                   | F                                            | NE Italy gypsy                     | G/G                              | G/G                               | C/C                                                                       | -                                  | T/T                                | -                                           |
| CAM      | Jr(a-)                                                   | F                                            | SW France gypsy                    | G/G                              | G/G                               | C/C                                                                       | -                                  | G/T                                | -                                           |
| CHA      | Jr(a-)                                                   | F                                            | Southeastern France                | G/G                              | G/G                               | C/C                                                                       | -                                  | G/G                                | -                                           |
| KER      | Jr(a-)                                                   | F                                            | Turkey ?                           | G/G                              | G/G                               | C/C                                                                       | -                                  | G/G                                | -                                           |
| CIN      | Jr(a-)                                                   | F                                            | Turkey ?                           | G/G                              | G/G                               | C/C                                                                       | -                                  | G/G                                | -                                           |
| GUE      | Jr(a-)                                                   | F                                            | French Antilles                    | G/A                              | G/A                               | C/C                                                                       | -                                  | G/G                                | -                                           |
| HAF      | Jr(a-)                                                   | F                                            | Pakistan                           | G/G                              | G/G                               | C/C                                                                       | -                                  | G/G                                | -                                           |

**Supplementary Table 1 (first part): Sequencing results of ABCG2 in the 18 Jr(a-) subjects analyzed in this study.** Only the positions showing a difference with reference ABCG2 genomic sequence NT\_016354.19 in at least one subject are indicated. The mutations responsible for the Jr(a-) blood group phenotype are shown in red (HO for homozygous, HT for heterozygous).

Saison *et al.*, Supplementary Information

| Subjects | Exon 7               |                              | Exon 8 | Exon 9 | Intron 9 | Intron 11 | Intron 12 | Intron 13 | Intron 14 |
|----------|----------------------|------------------------------|--------|--------|----------|-----------|-----------|-----------|-----------|
|          | c.706C>T<br>nonsense | c.791_792delTT<br>frameshift |        |        |          |           |           |           |           |
| BENA     | -                    | -                            | -      | -      | T/T      | A/A       | G/G       | T/T       | A/A       |
| YAN      | -                    | -                            | -      | -      | A/A      | A/A       | G/G       | C/C       | A/A       |
| KAN      | -                    | -                            | -      | -      | A/A      | A/A       | G/G       | C/C       | A/A       |
| LEV      | -                    | -                            | -      | -      | A/T      | A/A       | G/G       | T/C       | A/A       |
| BER      | HT                   | -                            | -      | -      | A/T      | A/A       | G/G       | T/C       | A/A       |
| BOU      | HO                   | -                            | -      | -      | T/T      | A/A       | G/G       | T/T       | A/A       |
| GIM      | HO                   | -                            | -      | -      | A/A      | A/A       | G/G       | C/C       | A/A       |
| PAT      | HO                   | -                            | -      | -      | A/A      | A/A       | G/G       | C/C       | A/A       |
| BENO     | HO                   | -                            | -      | -      | A/A      | A/A       | G/G       | C/C       | A/A       |
| REN      | HO                   | -                            | -      | -      | A/A      | A/A       | G/G       | C/C       | A/A       |
| REI      | HO                   | -                            | -      | -      | A/A      | A/A       | G/G       | C/C       | A/A       |
| KAR      | HO                   | -                            | -      | -      | A/A      | A/A       | G/G       | C/C       | A/A       |
| CAM      | HT                   | HT                           | -      | -      | A/A      | A/A       | G/G       | C/C       | A/A       |
| CHA      | -                    | HO                           | -      | -      | A/A      | A/A       | G/G       | C/C       | A/A       |
| KER      | -                    | HO                           | -      | -      | A/A      | A/A       | G/G       | C/C       | A/A       |
| CIN      | -                    | HO                           | -      | -      | A/A      | A/A       | G/G       | C/C       | A/A       |
| GUE      | -                    | HT                           | HT     | -      | A/A      | G/G       | G/G       | T/T       | G/G       |
| HAF      | -                    | -                            | -      | HO     | A/A      | A/A       | T/T       | T/T       | G/G       |

Supplementary Table 1 (second part)

## Saison *et al.*, Supplementary Information

| Exon | Primer   | Sequence                   | Orientation | Position on NT_016354.19 | Reference               |
|------|----------|----------------------------|-------------|--------------------------|-------------------------|
| 2    | ABCG2-6  | CTGCTCATTGCCGCACATTT       | sense       | 13608998-13608979        | <i>Lee et al.</i>       |
|      | ABCG2-7  | GCCAAAACCTGTGAGGTTCA       | antisense   | 13608599-13608618        | <i>Lee et al.</i>       |
| 3    | ABCG2-8  | GTTGGTTTGTGCTTGTGTTTC      | sense       | 13601635-13601616        | <i>Lee et al.</i>       |
|      | ABCG2-9  | GCGTTGCAAATGCTCAATAA       | antisense   | 13601342-13601361        | <i>Lee et al.</i>       |
| 4    | ABCG2-1b | TGGATTCAAAGTAGCCATGAGA     | sense       | 13600902-13600881        | <i>Lee et al.</i>       |
|      | ABCG2-2b | ATTCTCCCTGCCTTTTCACA       | antisense   | 13600501-13600520        | <i>Lee et al.</i>       |
| 5    | ABCG2-10 | GGTTCATCATTAGCTAGAACTTTACC | sense       | 13600216-13600191        | <i>Lee et al.</i>       |
|      | ABCG2-11 | TGGAAAGCAACCATTTTTGA       | antisense   | 13599814-13599833        | <i>Lee et al.</i>       |
| 6    | ABCG2-3b | TCTTACAGGACTGGCACACG       | sense       | 13590750-13590731        | <i>Lee et al.</i>       |
|      | ABCG2-4b | CCTTCCCTACATTCTTACCTGCT    | antisense   | 13590325-13590347        | <i>Lee et al.</i>       |
| 7    | ABCG2-12 | TCAGGCTGAACTAGAGCAAACA     | sense       | 13587240-13587219        | <i>Lee et al.</i>       |
|      | ABCG2-13 | AGCACCAAATGGAACAAACA       | antisense   | 13586834-13586853        | <i>Lee et al.</i>       |
| 8    | ABCG2-14 | CGTGGGAAGAAGAGAGAAAGAAA    | sense       | 13584075-13584053        | <i>Lee et al.</i>       |
|      | ABCG2-15 | CAAAAACACCAACAGCACTCA      | antisense   | 13583664-13583684        | <i>Lee et al.</i>       |
| 9    | ABCG2-5b | GGTGTTAGGGAAGCATCCAA       | sense       | 13582523-13582504        | <i>Lee et al.</i>       |
|      | ABCG2-6b | TGAAGCAGATGATAACAGAACCA    | antisense   | 13582111-13582133        | <i>Lee et al.</i>       |
| 10   | ABCG2-30 | GCCAAGCCATTGAGTGTTTA       | sense       | 13576274-13576255        | <i>Itoda et al.</i>     |
|      | ABCG2-33 | CTGACTCATCCTACCCTCAA       | antisense   | 13575924-13575943        | <i>Itoda et al.</i>     |
| 11   | ABCG2-34 | TGTGGAAAGAGTTTTGTGGGTA     | sense       | 13570274-13570253        | <i>Bäckström et al.</i> |
|      | ABCG2-35 | CCCAACCCAGATGTAATCA        | antisense   | 13570024-13570043        | <i>Bäckström et al.</i> |
| 12   | ABCG2-20 | GGTCTAGCCCTGAGGATGTG       | sense       | 13568457-13568438        | <i>Lee et al.</i>       |
|      | ABCG2-21 | GAGTGCAAATGGACAGGTG        | antisense   | 13568055-13568074        | <i>Lee et al.</i>       |
| 13   | ABCG2-22 | AGGGTGGTTGGAGAGTGGAT       | sense       | 13566622-13566603        | <i>Lee et al.</i>       |
|      | ABCG2-23 | AGCAGAGCCCCATTACAGA        | antisense   | 13566211-13566230        | <i>Lee et al.</i>       |
| 14   | ABCG2-38 | TGGTAGGGACTTGAAGAGGGTA     | sense       | 13564567-13564546        | <i>Bäckström et al.</i> |
|      | ABCG2-39 | AGCTCATGGTCAGGGAAATG       | antisense   | 13564301-13564320        | <i>Bäckström et al.</i> |
| 15   | ABCG2-26 | TCTTGATTGCCAGGGAAAAT       | sense       | 13563704-13563685        | <i>Lee et al.</i>       |
|      | ABCG2-27 | CGCGCACAACTCACTTTATG       | antisense   | 13563301-13563320        | <i>Lee et al.</i>       |
| 16   | ABCG2-28 | TGACGGATGCTAGGAATGAA       | sense       | 13561302-13561283        | <i>Lee et al.</i>       |
|      | ABCG2-29 | CCCATGGTTACTGTCTGAGGA      | antisense   | 13560873-13560893        | <i>Lee et al.</i>       |

**Supplementary Table 2: Description of the primers used in this study for amplifying and sequencing ABCG2.**
